# Supplementary material
Source: ML conference proceedings conference paper supplement (https://proceedings.neurips.cc/paper_files/paper/2020/hash/fd5c905bcd8c3348ad1b35d7231ee2b1-Abstract.html)
Supplement: Supplementary file [file fd5c905bcd8c3348ad1b35d7231ee2b1-Supplemental.pdf]

---

# Agnostic $Q$ -learning with Function Approximation in Deterministic Systems: Near-Optimal Bounds on Approximation Error and Sample Complexity

---

Anonymous Author(s)

Affiliation

Address

email

## Abstract

1 The current paper studies the problem of agnostic  $Q$ -learning with function approx-  
2 imation in deterministic systems where the optimal  $Q$ -function is approximable  
3 by a function in the class  $\mathcal{F}$  with approximation error  $\delta \geq 0$ . We propose a novel  
4 recursion-based algorithm and show that if  $\delta = O(\rho/\sqrt{\dim_E})$ , then one can find  
5 the optimal policy using  $O(\dim_E)$  trajectories, where  $\rho$  is the gap between the  
6 optimal  $Q$ -value of the best actions and that of the second-best actions and  $\dim_E$   
7 is the Eluder dimension of  $\mathcal{F}$ . Our result has two implications:

- 8 1. In conjunction with the lower bound in [Du et al., 2020], our upper bound  
9 suggests that the condition  $\delta = \tilde{\Theta}(\rho/\sqrt{\dim_E})$  is necessary and sufficient for  
10 algorithms with polynomial sample complexity.
- 11 2. In conjunction with the obvious lower bound in the tabular case, our upper  
12 bound suggests that the sample complexity  $\tilde{\Theta}(\dim_E)$  is tight in the agnostic  
13 setting.

14 Therefore, we help address the open problem on agnostic  $Q$ -learning proposed  
15 in [Wen and Van Roy, 2013]. We further extend our algorithm to the stochastic  
16 reward setting and obtain similar results.

## 17 1 Introduction

18  $Q$ -learning is a fundamental approach in reinforcement learning [Watkins and Dayan, 1992]. Empiri-  
19 cally, combining  $Q$ -learning with function approximation schemes has lead to tremendous success  
20 on various sequential decision-making problems. However, theoretically, we only have a good  
21 understanding of  $Q$ -learning in the tabular setting. Strehl et al. [2006], Jin et al. [2018] show that  
22 with certain exploration techniques,  $Q$ -learning provably finds a near-optimal policy with sample  
23 complexity polynomial in the number of states, number of actions and the planning horizon. However,  
24 modern reinforcement learning applications often require dealing with large state space where the  
25 polynomial dependency on the number of states is not acceptable.

26 Recently, there has been great interest in designing and analyzing  $Q$ -learning algorithms with  
27 linear function approximation [Wen and Van Roy, 2013, Du et al., 2019]. Under various additional  
28 assumptions, these works show that one can obtain a near-optimal policy using  $Q$ -learning with  
29 sample complexity polynomial in the feature dimension  $d$  and the planning horizon, if the optimal  
30  $Q$ -function is an exact linear function of the  $d$ -dimensional features of the state-action pairs.

31 A major drawback of these works is that the algorithms can only be applied in the well-specified case,  
32 i.e., the optimal  $Q$ -function is an exact linear function. In practice, the optimal  $Q$ -function is usually  
33 linear up to small approximation errors instead of being exactly linear. In this paper, we focus on

34 the agnostic setting, i.e., the optimal  $Q$ -function can only be approximated by a function class with  
 35 approximation error  $\delta$ , which is closer to practical scenarios. Indeed, designing a provably efficient  
 36  $Q$ -learning algorithm in the agnostic setting is an open problem posed by Wen and Van Roy [2013].

37 Technically, the agnostic setting is arguably more challenging than the exact setting. As recently  
 38 shown by Du et al. [2020], for the class of linear functions, when the approximation error  $\delta =$   
 39  $\Omega(\sqrt{\text{poly}(H)/d})$  where  $H$  is the planning horizon, any algorithm needs to sample exponential  
 40 number of trajectories to find a near-optimal policy even in deterministic systems. Therefore, for  
 41 algorithms with polynomial sample complexity, additional assumptions are needed to bypass the  
 42 hardness result. For the exact setting  $\delta = 0$ , Wen and Van Roy [2013] show that one can find an  
 43 optimal policy using polynomial number of trajectories for linear functions in deterministic systems,  
 44 which implies that the agnostic setting could be exponentially harder than the exact setting.

45 Due to the technical challenges, for the agnostic setting, previous papers mostly focus on the bandit  
 46 setting or reinforcement learning with a generative model [Lattimore and Szepesvari, 2019, Van Roy  
 47 and Dong, 2019, Neu and Olkhovskaya, 2020], and much less is known for the standard reinforcement  
 48 learning setting. In this paper, we design  $Q$ -learning algorithms with provable guarantees in the  
 49 agnostic case for the standard reinforcement learning setting.

## 50 1.1 Our Contributions

51 Our main contribution is a provably efficient  $Q$ -learning algorithm for the agnostic setting with  
 52 general function approximation in deterministic systems. Our results help address the open problem  
 53 posed by Wen and Van Roy [2013].

54 **Theorem 1.1** (Informal). *For a given episodic deterministic system and a function class  $\mathcal{F}$ , suppose*  
 55 *there exists  $f \in \mathcal{F}$  such that the optimal  $Q$ -function  $Q^*$  satisfies  $|f(s, a) - Q^*(s, a)| \leq \delta$  for*  
 56 *any state-action pair  $(s, a)$ . Suppose  $\rho = \Omega(\sqrt{\dim_E \delta})$ , where the optimality gap  $\rho$  is the gap*  
 57 *between the optimal  $Q$ -value of the best action and that of the second-best action (formally defined in*  
 58 *Definition 3.1) and  $\dim_E$  is the Eluder dimension of  $\mathcal{F}$  (see Definition 3.5), our algorithm finds the*  
 59 *optimal policy using  $O(\dim_E)$  trajectories.*

60 Our main assumption is that the optimality gap  $\rho$  satisfies  $\rho = \Omega(\sqrt{\dim_E \delta})$ . Below we discuss the  
 61 necessity of this assumption and its connection with the recent hardness result in Du et al. [2020].

62 In Du et al. [2020], it has been proved that in deterministic systems, if the optimality gap  $\rho = 1$   
 63 and the optimal  $Q$ -function can be approximated by linear functions with approximation error  
 64  $\delta = \Omega(\sqrt{\text{poly}(H)/d})$ , any algorithm needs to sample exponential number of trajectories to find  
 65 a near-optimal policy even in deterministic systems. Here  $d$  is the input dimension of the linear  
 66 functions. Using the same technique as in [Du et al., 2020], we show the following hardness result  
 67 for  $Q$ -learning with linear function approximation in the agnostic setting.

68 **Proposition 1.2** (Generalization of Theorem 4.1 in [Du et al., 2020]). *For any  $\rho \leq 1$ , there exists*  
 69 *a family of deterministic systems where the optimality gap is  $\rho$  and the optimal  $Q$ -function can*  
 70 *be approximated by linear functions with approximation error  $\delta = O(C/\sqrt{d} \cdot \rho)$ , such that any*  
 71 *algorithm that returns a  $\rho/2$ -optimal policy needs to sample  $\Omega(2^C)$  trajectories.*

72 By setting  $C = O(\log(Hd))$  such that  $2^C = \text{poly}(Hd)$ , Proposition 1.2 implies that for any  
 73 algorithm with polynomial sample complexity, the approximation error  $\delta$  that can be handled is at  
 74 most  $\tilde{O}(\rho/\sqrt{d})$ . Recall that the Eluder dimension of linear functions is  $\tilde{O}(d)$ . Theorem 1.1 suggests  
 75 that as long as  $\rho = \tilde{\Omega}(\sqrt{d}\delta)$ , our algorithm finds the optimal policy using polynomial number of  
 76 samples. Note that this applies to every pair of  $(\rho, \delta)$  that satisfies the condition. Proposition 1.2  
 77 suggests that there exist environments with  $\rho = \tilde{\Omega}(\sqrt{d}\delta)$  which require exponential number of  
 78 samples to find a near-optimal policy. Therefore, combining Theorem 1.1 and Proposition 1.2, we  
 79 give a tight characterization (up to logarithmic factors) on the quantitative relation between  $\rho$  and  $\delta$   
 80 under which one can use polynomial number of samples to find the optimal policy.

81 Our result is in the same spirit as the results in [Lattimore and Szepesvari, 2019, Van Roy and  
 82 Dong, 2019], which also demonstrate the tightness of the hardness result in [Du et al., 2020].  
 83 However, as will be made clear, technically our result significantly deviates from those in [Lattimore  
 84 and Szepesvari, 2019, Van Roy and Dong, 2019]. See Section 2 for more detailed comparison  
 85 with [Lattimore and Szepesvari, 2019, Van Roy and Dong, 2019].

86 Note that the sample complexity of our algorithm is linear in the Eluder dimension of the function  
87 class. For the tabular setting, the Eluder dimension is as large as the cardinality of the state-action  
88 space [Russo and Van Roy, 2013]. This cardinality is also a sample complexity lower bound, i.e.,  
89 for the tabular setting, the sample complexity lower bound is  $\Omega(\dim_E)$ . Therefore, our sample  
90 complexity is also tight.

91 Finally, we show how to generalize our results to handle stochastic rewards. Under the same  
92 assumption that  $\rho = \Omega(\sqrt{\dim_E \delta})$ , our algorithm finds an optimal policy using  $\frac{\text{poly}(\dim_E, H)}{\rho^2} \log(1/p)$   
93 trajectories with failure probability  $p$ . We would like to remark that the  $\log(1/p)/\rho^2$  dependency is  
94 necessary for finding optimal policies even in the bandit setting [Mannor and Tsitsiklis, 2004].

95 **Organization** In Section 2, we review related work. In Section 3, we introduce necessary notations,  
96 definitions and assumptions. In Section 4, we discuss the special case where  $\mathcal{F}$  is the class of  
97 linear functions to demonstrate the high-level approach of our algorithm and the intuition behind the  
98 analysis. We then present the result for general function classes in Section 5. We conclude in Section  
99 6 and defer proofs to the supplementary material.

## 100 2 Related Work

101 Classical theoretical reinforcement learning literature studies asymptotic behavior of concrete algo-  
102 rithms or finite sample complexity bounds for  $Q$ -learning algorithms under various assumptions [Melo  
103 and Ribeiro, 2007, Zou et al., 2019]. These works usually assume the initial policy has certain benign  
104 properties, which may not hold in practical applications. Another line of work focuses on sample  
105 complexity and regret bound in the tabular setting [Lattimore and Hutter, 2012, Azar et al., 2013,  
106 Sidford et al., 2018a,b, Agarwal et al., 2019, Jaksch et al., 2010, Agrawal and Jia, 2017, Azar et al.,  
107 2017, Kakade et al., 2018]. Strehl et al. [2006], Jin et al. [2018] show that with certain exploration  
108 techniques,  $Q$ -learning provably finds a near-optimal with polynomial sample complexity. However,  
109 these works have sample complexity at least linearly depends on the number of states, which is  
110 necessary without additional assumptions [Jaksch et al., 2010].

111 Various exploration algorithms are proposed for  $Q$ -learning with function approximation [Azizzade-  
112 nesheli et al., 2018, Fortunato et al., 2018, Lipton et al., 2018, Osband et al., 2016, Pazis and Parr,  
113 2013]. However, none of these algorithms have polynomial sample complexity guarantees. Li et al.  
114 [2011] propose a  $Q$ -learning algorithm which requires the Know-What-It-Knows oracle. However, it  
115 is unknown how to implement such oracle in general. Wen and Van Roy [2013] propose an algorithm  
116 for  $Q$ -learning with function approximation in deterministic systems which works for a family of  
117 function classes in the exact setting. For the agnostic setting, the algorithm in [Wen and Van Roy,  
118 2013] can only be applied to a special case called “state aggregation case”. See Section 4.3 in [Wen  
119 and Van Roy, 2013] for more details. Indeed, as stated in the conclusion of [Wen and Van Roy, 2013],  
120 designing provably efficient algorithm for agnostic  $Q$ -learning with general function approximation  
121 is a challenging open problem.

122 Du et al. [2019] propose an algorithm for  $Q$ -learning with linear function approximation in the exact  
123 setting. The algorithm in [Du et al., 2019] further requires conditions on the optimality gap  $\rho$  and a  
124 low-variance condition on the transition. Our algorithms also requires conditions on the optimality  
125 gap  $\rho$  and shares similar recursion-based structures as the algorithm in [Du et al., 2019]. However, our  
126 algorithm handles general function classes with bounded Eluder dimension and with approximation  
127 error, neither of which can be handled by the algorithm in [Du et al., 2019].

128 Recently, Du et al. [2020] proved lower bounds for  $Q$ -learning algorithm in the agnostic setting. As  
129 mentioned in the introduction, our algorithm complements the lower bounds in [Du et al., 2020]  
130 and demonstrates the tightness of their lower bound. Lattimore and Szepesvari [2019], Van Roy and  
131 Dong [2019] also give algorithms in the agnostic setting to demonstrate the tightness of the lower  
132 bound in [Du et al., 2020] from other perspectives. Technically, our results are different from those  
133 in [Lattimore and Szepesvari, 2019, Van Roy and Dong, 2019] in the following ways. First, we  
134 study the standard reinforcement learning setting, where Van Roy and Dong [2019] focus on the  
135 bandit setting and Lattimore and Szepesvari [2019] study both the bandit setting and reinforcement  
136 learning with a generative model. Second, for the reinforcement learning result in [Lattimore and  
137 Szepesvari, 2019], it is further assumed that  $Q$ -functions induced by *all* policies can be approximated  
138 by linear functions, while in this paper we only assume the optimal  $Q$ -function can be approximated

139 by a function class with bounded Eluder dimension, which is much weaker than the assumption  
 140 in [Lattimore and Szepesvari, 2019]. In conjunction with the lower bound in [Du et al., 2020], we  
 141 give a tight condition  $\delta = \tilde{\Theta}(\rho/\sqrt{\dim_E})$  under which there is an algorithm with polynomial sample  
 142 complexity to find the optimal policy.

143 Recently, a line of work study  $Q$ -learning in the linear MDP setting [Yang and Wang, 2019b,a,  
 144 Jin et al., 2019, Wang et al., 2019]. In the linear MDP setting, it is assumed that both the reward  
 145 function and the transition operator is linear, which is stronger than the assumption that the optimal  
 146  $Q$ -function is linear studied in this paper. For the linear MDP setting, algorithms with polynomial  
 147 sample complexity are known, and these algorithms can usually handle approximation errors on the  
 148 reward function and the transition operator.

### 149 3 Preliminaries

150 **Notations** We write  $[n]$  to denote the set  $\{1, 2, \dots, n\}$ . We use  $\|\cdot\|_p$  to denote the  $\ell_p$  norm of a  
 151 vector. For any finite set  $S$ , we write  $\Delta(S)$  to denote the probability simplex.

#### 152 3.1 Episodic Reinforcement Learning

153 In this paper, we consider Markov Decision Processes with deterministic transition and stochastic  
 154 reward. Formally, let  $\mathcal{M} = (\mathcal{S}, \mathcal{A}, H, P, R)$  be a Markov Decision Process (MDP) where  $\mathcal{S}$  is the  
 155 state space,  $\mathcal{A}$  is the action space,  $H \in \mathbb{Z}_+$  is the planning horizon,  $P : \mathcal{S} \times \mathcal{A} \rightarrow \mathcal{S}$  is the deterministic  
 156 transition function which takes a state-action pair and returns a state, and  $R : \mathcal{S} \times \mathcal{A} \rightarrow \Delta(\mathbb{R})$  is the  
 157 reward distribution. When the reward is deterministic, we may regard  $R : \mathcal{S} \times \mathcal{A} \rightarrow \mathbb{R}$  as a function  
 158 instead of a distribution. We assume there is a fixed initial state  $s_1$ .

159 A policy  $\pi : \mathcal{S} \rightarrow \Delta(\mathcal{A})$  prescribes a distribution over actions for each state. The policy  $\pi$  induces  
 160 a (random) trajectory  $s_1, a_1, r_1, s_2, a_2, r_2, \dots, s_H, a_H, r_H$  where  $a_1 \sim \pi(s_1)$ ,  $r_1 \sim R(s_1, a_1)$ ,  
 161  $s_2 = P(s_1, a_1)$ ,  $a_2 \sim \pi(s_2)$ , etc. To streamline our analysis, for each  $h \in [H]$ , we use  $\mathcal{S}_h \subseteq \mathcal{S}$   
 162 to denote the set of states at level  $h$ , and we assume  $\mathcal{S}_h$  do not intersect with each other.<sup>1</sup> We also  
 163 assume  $\sum_{h=1}^H r_h \in [0, 1]$ . Our goal is to find a policy  $\pi$  that maximizes the expected total reward  
 164  $\mathbb{E} \left[ \sum_{h=1}^H r_h \mid \pi \right]$ . We use  $\pi^*$  to denote the optimal policy.

#### 165 3.2 $Q$ -function, $V$ -function and the Optimality Gap

166 An important concept in RL is the  $Q$ -function. Given a policy  $\pi$ , a level  $h \in [H]$  and a state-action  
 167 pair  $(s, a) \in \mathcal{S}_h \times \mathcal{A}$ , the  $Q$ -function is defined as  $Q_h^\pi(s, a) = \mathbb{E} \left[ \sum_{h'=h}^H r_{h'} \mid s_h = s, a_h = a, \pi \right]$ .

168 For simplicity, we denote  $Q_h^*(s, a) = Q_h^{\pi^*}(s, a)$ . It will also be useful to define the value function  
 169 of a given state  $s \in \mathcal{S}_h$  as  $V_h^\pi(s) = \mathbb{E} \left[ \sum_{h'=h}^H r_{h'} \mid s_h = s, \pi \right]$ . For simplicity, we denote  $V_h^*(s) =$   
 170  $V_h^{\pi^*}(s)$ . Throughout the paper, for the  $Q$ -function  $Q_h^\pi$  and  $Q_h^*$  and the value function  $V_h^\pi$  and  $V_h^*$ ,  
 171 we may omit  $h$  from the subscript when it is clear from the context.

172 In addition to these definitions, we list below an important concept, the optimality gap, which is  
 173 widely used in reinforcement learning and bandit literature.

174 **Definition 3.1** (Optimality Gap). *The optimality gap  $\rho$  is defined as  $\rho = \inf_{Q^*(s,a) \neq V^*(s)} V^*(s) -$   
 175  $Q^*(s, a)$ .*

176 In words,  $\rho$  is the smallest reward-to-go difference between the best set of actions and the rest. In  
 177 this paper we need  $\rho$  to be strictly positive. We remark that this is not a restrictive assumption.  
 178 This assumption is widely used in bandit problems Abbasi-Yadkori et al. [2011], Dani et al. [2008],  
 179 Lattimore and Szepesvári [2018]. Recently, Du et al. [2019] gave a provably efficient  $Q$ -learning  
 180 algorithm based on this assumption. Simchowitz and Jamieson [2019] showed that with this condition,  
 181 the agent only incurs logarithmic regret in the tabular setting and Zanette et al. [2019] showed that  
 182 under this condition, one can remove all horizon dependencies in the sample complexity. Empirically,

<sup>1</sup>This assumption is only for the sake of presentation. Our result can be easily generalized to the case when  
 this assumption does not hold.

183 arguably all environments with a finite action set satisfy the optimality gap conditions. In Atari-games,  
 184 e.g., Freeway, the optimal  $Q$  value is often distinctive from the rest of actions. For board games, e.g.  
 185 tic-tac-toe, Chess, etc, most states have zero rewards except for the winning states. Hence, every  
 186 optimal action has a  $Q$ -value of 1 and the rest actions have a  $Q$ -value of 0, in which case  $\rho = 1$  by  
 187 Definition 3.1.

### 188 3.3 Function Approximation and Eluder Dimension

189 When the state space is large, we need structures on the state space so that reinforcement learning  
 190 methods can generalize. For a given function class  $\mathcal{F}$ , each  $f \in \mathcal{F}$  is a function that maps a state-  
 191 action pair to a real number. For a given MDP and a function class  $\mathcal{F}$ , we define the approximation  
 192 error to the optimal  $Q$ -function as follow.

193 **Definition 3.2** (Approximation Error). *For a given MDP and a function class  $\mathcal{F}$ , the approximation*  
 194 *error  $\delta$  is defined to be  $\delta = \inf_{f \in \mathcal{F}} \sup_{(s,a) \in \mathcal{S} \times \mathcal{A}} |f(s, a) - Q^*(s, a)|$ .*

195 Here, the approximation error  $\delta$  characterizes how well the given function class  $\mathcal{F}$  approximates the  
 196 optimal  $Q$ -function. When  $\delta = 0$ , then optimal  $Q$ -function can be perfectly predicted by the function  
 197 class, which has been studied in previous papers [Wen and Van Roy, 2013, Du et al., 2019]. In this  
 198 paper, we focus the case  $\delta > 0$ .

199 An important function class is the class of linear functions. We assume the agent is given a feature  
 200 extractor  $\phi : \mathcal{S} \times \mathcal{A} \rightarrow \mathbb{R}^d$  where  $\|\phi(s, a)\|_2 \leq 1$  for all state-action pairs. The feature extractor can  
 201 be hand-crafted or a pre-trained neural network that transforms a state-action pair to a  $d$ -dimensional  
 202 embedding. Given the feature extractor  $\phi$ , we define the class of linear functions as follow.

203 **Definition 3.3.** *For a vector  $\theta \in \mathbb{R}^d$ , we define  $f_\theta(s, a) = \theta^\top \phi(s, a)$ . The class of linear functions*  
 204 *is defined as  $\mathcal{F} = \{f_\theta \mid \|\theta\|_2 \leq 1\}$ .*

205 Here we assume  $\|\theta\|_2 \leq 1$  only for normalization purposes.

206 For general function classes, an important concept is the *Eluder dimension*, for which we first need to  
 207 introduce the concept of  $\epsilon$ -dependence.

208 **Definition 3.4** ( $\epsilon$ -dependence [Russo and Van Roy, 2013]). *For a function class  $\mathcal{F}$ , we say a state-*  
 209 *action pair  $(s, a)$  is  $\epsilon$ -dependent on state-action pairs  $\{(s_1, a_1), \dots, (s_n, a_n)\} \subset \mathcal{S} \times \mathcal{A}$  with respect*  
 210 *to  $\mathcal{F}$  if for all  $f_1, f_2 \in \mathcal{F}$ ,*

$$\sum_{i=1}^n |f_1(s_i, a_i) - f_2(s_i, a_i)|^2 \leq \epsilon^2 \implies |f_1(s, a) - f_2(s, a)|^2 \leq \epsilon^2.$$

211 *Further,  $(s, a)$  is  $\epsilon$ -independent of state-action pairs  $\{(s_1, a_1), \dots, (s_n, a_n)\}$  if  $(s, a)$  is not  $\epsilon$ -*  
 212 *dependent on state-action pairs  $\{(s_1, a_1), \dots, (s_n, a_n)\}$ .*

213 Now, we recall the definition of  $\epsilon$ -Eluder dimension as introduced in Russo and Van Roy [2013].

214 **Definition 3.5** ( $\epsilon$ -Eluder Dimension). *For a function class  $\mathcal{F}$ , the  $\epsilon$ -Eluder dimension  $\dim_E(\mathcal{F}, \epsilon)$  is*  
 215 *the length of the longest sequence of elements in  $\mathcal{S} \times \mathcal{A}$  such that every element is  $\epsilon'$ -independent of*  
 216 *its predecessors for some  $\epsilon' \geq \epsilon$ .*

217 As an example, when  $\mathcal{F}$  is the class of linear functions with norm  $\|\theta\|_2 \leq 1$  and  $\|\phi(s, a)\|_2 \leq 1$ ,  
 218 the  $\epsilon$ -Eluder dimension  $\dim_E(\mathcal{F}, \epsilon)$  is  $O(d \log(1/\epsilon))$  as noted in Example 4 in Russo and Van Roy  
 219 [2013]. We refer interested readers to Russo and Van Roy [2013] for more examples.

220 We remark that in this paper, the sample complexity of our algorithm depends on the  $\epsilon$ -Eluder  
 221 dimension introduced in Russo and Van Roy [2013] instead of the the Eluder dimension introduced  
 222 in Wen and Van Roy [2013], since the Eluder dimension introduced in Wen and Van Roy [2013] is  
 223 defined for the exact case and therefore cannot handle approximation errors.

## 224 4 Algorithm for Linear Functions

225 In this section, we consider the special case where  $\mathcal{F}$  is the class of linear functions to demonstrate  
 226 the high-level approach of our algorithm and the intuition behind the analysis. For simplicity, we also

---

**Algorithm 1** Main Algorithm

---

1: Initialize the current policy  $\pi$  arbitrarily  
2: **set**  $C = \rho^2/16 \cdot I \in \mathbb{R}^{d \times d}$   
3: **set**  $Y = 0 \in \mathbb{R}^d$   
4: **invoke**  $\text{Explore}(s_1)$   
5: **return**  $\pi$

---

---

**Algorithm 2**  $\text{Explore}(s)$ 

---

1: **for**  $a \in \mathcal{A}$  **do**  
2:   **if**  $\phi(s, a)^\top C^{-1} \phi(s, a) \leq 1$  **then**  
3:     **set**  $\hat{Q}(s, a) = \phi(s, a)^\top C^{-1} Y$   
4:   **else**  
5:     **let**  $s' = P(s, a)$   
6:     **set**

$$\hat{Q}(s, a) = \begin{cases} r(s, a) & \text{if } s \in \mathcal{S}_H \\ \text{Explore}(s') + r(s, a) & \text{otherwise} \end{cases}$$

7:     **set**  $C = C + \phi(s, a)\phi(s, a)^\top, Y = Y + \phi(s, a)\hat{Q}(s, a)$   
8:   **end if**  
9: **end for**  
10: **set**  $\pi(s) = \operatorname{argmax}_{a \in \mathcal{A}} \hat{Q}(s, a)$ .  
11: **return**  $r(s, \pi(s)) + \text{Explore}(P(s, \pi(s)))$

---

227 assume that the size of action space  $\mathcal{A}$  is bounded by a constant and the reward is deterministic. We  
228 show how to remove these assumptions in the following sections.

229 Our goal is to show when  $\rho = \Omega(\delta\sqrt{d\log(1/\rho)})$ , Algorithm 1 learns the optimal policy  $\pi^*$  using  
230 nearly linear number of trajectories.

231 **Theorem 4.1.** *Suppose  $\rho \geq 4\delta(\sqrt{2d\log(16/\rho^2)} + 1)$ . Algorithm 1 returns the optimal policy  $\pi^*$*   
232 *using at most  $O(d\log(1/\rho))$  trajectories.*

233 The complete proof is provided in the supplementary material. On a high level, our algorithm is  
234 divided into two parts: Algorithm 1 in which we define the main loop and Algorithm 2 in which  
235 we define a recursion-based subroutine  $\text{Explore}(s)$  to calculate the optimal values. Intuitively, the  
236 subroutine  $\text{Explore}(s)$  should return  $V^*(s)$ , and upon the termination of  $\text{Explore}(s)$  we should have  
237  $\pi(s) = \pi^*(s)$ .

238 In our algorithm, we maintain a dataset to store the features of a subset of the state-action pairs  $\phi(s, a)$   
239 and their optimal  $Q$ -values  $Q^*(s, a)$ . Here, the matrix  $C \in \mathbb{R}^d$  is the covariance of the dataset, i.e.,  
240  $C = \sum \phi(s, a)\phi(s, a)^\top$  and  $Y = \sum \phi(s, a)Q^*(s, a)$ . In order to predict the optimal  $Q$ -value of an  
241 unseen state-action pair  $(s, a)$  using least squares, we may directly calculate  $\phi(s, a)^\top C^{-1}Y$  if  $C$  is  
242 invertible. We use a ridge term of  $\rho^2/16$  to make sure  $C$  is always invertible.

243 The high-level idea behind our algorithm is simple: we use least squares to predict the optimal  
244  $Q$ -value whenever possible, and use recursions to figure out the optimal  $Q$ -value otherwise. One  
245 technical subtlety here is: What condition should we check to decide whether we can calculate the  
246 optimal  $Q$ -value directly by least squares or we need to make recursive calls? This condition needs to  
247 be chosen carefully, since if we make too many recursive calls, the overall sample complexity will be  
248 unbounded, and if we make too few recursive calls, the optimal  $Q$ -values estimated by linear squares  
249 will be inaccurate which affects the correctness of the algorithm.

250 In Line 2 of  $\text{Explore}(s)$ , we check whether  $\phi(s, a)^\top C^{-1} \phi(s, a) \leq 1$ , which is the condition we use  
251 to decide whether we should make recursive calls or calculate the optimal  $Q$ -value directly by least  
252 squares. Here  $\phi(s, a)^\top C^{-1} \phi(s, a)$  is the variance of the prediction, which is common in UCB-type  
253 algorithm for linear contextual bandit (see e.g. Li et al. [2010]). In our algorithm, instead of using  
254  $\phi(s, a)^\top C^{-1} \phi(s, a)$  as an uncertainty bonus, we directly check its magnitude to decide whether  
255 the linear predictor learned on the collected dataset generalizes well on the new data  $\phi(s, a)$  or not.  
256 The effectiveness of such a choice follows from the following lemma which bounds the number of  
257 recursive calls made by our algorithm.

258 **Lemma 4.2.** *Line 7 is executed for at most  $2d \log(16/\rho^2)$  times.*

259 A proof is provided in the supplementary material. Moreover, in order to make sure that the value  
 260 returned by  $\text{Explore}(s)$  is accurate, in Line 11 of  $\text{Explore}(s)$ , we make recursive calls instead of using  
 261 the estimated  $Q$ -values  $\hat{Q}$ . As will be shown in the supplementary material, such a choice guarantees  
 262 that the value returned by  $\text{Explore}(s)$  always equals  $V^*(s)$ .

263 Lastly, we want to remark that if we use a  $\rho' < \rho$  in the algorithm, the algorithm is still correct and  
 264 the sample complexity will be  $O(d \log(1/\rho'))$ . For unknown  $\rho$ , one can use an exponential search in  
 265 a suitable range which will only increase the sample complexity by a logarithmic factor.

## 266 5 General Result

267 In this section, we consider the general case where  $\mathcal{F}$  is an arbitrary function class and provide a  
 268 provably efficient algorithm which is a generalization of the algorithm in Section 4. Note that we make  
 269 no assumptions on the action space  $\mathcal{A}$ . For simplicity, we assume that the reward is deterministic. We  
 270 show how to remove this assumption in the supplementary material. We first define the Maximum  
 271 Uncertainty Oracle which allows us to work with arbitrary action space.

### 272 5.1 Maximum Uncertainty Oracle

273 As discussed the previous section, it is useful to identify actions for which we can not accurately  
 274 compute the optimal  $Q$ -value using the least-squares predictor. We formalize this intuition to arrive  
 275 at the following oracle which finds the action with largest ‘‘uncertainty’’ for a given state  $s$ . We note  
 276 that similar oracles were also used in [Du et al., 2019].

277 **Definition 5.1** (Oracle( $s, \delta, Y$ )). *Given a state  $s \in \mathcal{S}$ ,  $\delta \geq 0$  and a set of state-action pairs  $Y \subseteq$   
 278  $\mathcal{S} \times \mathcal{A}$ , define*

$$(\hat{a}, \hat{f}_1, \hat{f}_2) = \underset{a \in \mathcal{A}, f_1, f_2 \in \mathcal{F}}{\operatorname{argmax}} |f_1(s, a) - f_2(s, a)|^2 \quad (1)$$

$$\text{s.t. } \frac{1}{|Y|} \sum_{(s', a') \in Y} |f_1(s', a') - f_2(s', a')|^2 \leq \delta^2. \quad (2)$$

279 *The oracle returns  $(\hat{a}, |\hat{f}_1(s, \hat{a}) - \hat{f}_2(s, \hat{a})|^2)$ .*

280 To motivate this oracle, suppose  $f_2$  is the function that gives the best approximation of the optimal  
 281  $Q$ -function, i.e., the optimizer  $f$  in Definition 3.2. In this scenario, we know  $f_1$  predicts well on  
 282 state-action pairs  $(s', a') \in Y$  which is implied by the constraint. Note that since we maximize over  
 283 the entire function class  $\mathcal{F}$ ,  $\hat{a}$  is the action with largest uncertainty. If  $|\hat{f}_1(s, \hat{a}) - \hat{f}_2(s, \hat{a})|^2$  is small,  
 284 then we can predict well on state  $s$  for all actions. Otherwise, if we cannot predict well on state  $s$  for  
 285 some action, so we need to explore and return the action with largest uncertainty.

286 **Remark 1.** *When  $\mathcal{F}$  is the class of linear functions, evaluating the oracle’s response amounts to  
 287 solving:*

$$(\hat{a}, \hat{\theta}_1, \hat{\theta}_2) = \underset{a \in \mathcal{A}, \theta_1, \theta_2 \in \mathcal{F}}{\operatorname{argmax}} |(\theta_1 - \theta_2)^\top \phi(s, a)|^2$$

$$\text{s.t. } (\theta_1 - \theta_2)^\top \left( \frac{1}{|Y|} \sum_{(s', a') \in Y} \phi(s', a') \phi(s', a')^\top \right) (\theta_1 - \theta_2) \leq \delta^2.$$

288 *In this case, using the notation in the algorithm in Section 4, it can be seen that the oracle returns the  
 289 action  $a \in \mathcal{A}$  which maximizes  $\phi(s, a)^\top C^{-1} \phi(s, a)$ .*

### 290 5.2 Algorithm

291 In this section, we present the high level intuition for the Algorithm 3. Our goal is to show that  
 292 when  $\rho = \Omega(\delta \sqrt{\dim_E(\mathcal{F}, \rho)})$ , our algorithm learns the optimal policy  $\pi^*$  using linear number of  
 293 trajectories (in terms of Eluder dimension).

---

**Algorithm 3** Main Algorithm

---

1: Initialize the current policy  $\pi$  and  $f$  arbitrarily.  
2: **set**  $Y = \{\}$   
3: **invoke** Explore( $s_1$ )  
4: **return**  $\pi$

---



---

**Algorithm 4** Explore( $s$ )

---

1: **set**  $(a, r) = \text{Oracle}(s, 2\delta, Y)$   
2: **while**  $r > |\frac{\rho}{2} - \delta|$  **do**  
3:   **set**  $Y = Y \cup \{(s, a, \text{Explore}(P(s, a)) + r(s, a))\}$   
4:   **set**  $(a, r) = \text{Oracle}(s, 2\delta, Y)$   
5: **end while**  
6: **set**  $f = \operatorname{argmin}_{f \in \mathcal{F}} \sum_{(s_i, a_i, y_i) \in Y} |f(s_i, a_i) - y_i|^2$   
7: **set**  $\pi(s) = \operatorname{argmax}_{a \in \mathcal{A}} f(s, a)$   
8: **return**  $r(s, \pi(s)) + \text{Explore}(P(s, \pi(s)))$

---

294 **Theorem 5.1.** *Suppose*

$$\rho \geq 6\sqrt{2}\delta \sqrt{\dim_E(\mathcal{F}, \frac{\rho}{4})}. \quad (3)$$

295 *Then Algorithm 3 returns the optimal policy  $\pi^*$  using at most  $O(\dim_E(\mathcal{F}, \rho/4))$  trajectories.*

296 The complete proof is provided in the supplementary material. Similar to the algorithm for linear  
297 functions given in Section 4, the algorithm for general function class is divided into two parts:  
298 Algorithm 3 and a subroutine Explore( $s$ ). Intuitively, the subroutine Explore( $s$ ) should return  $V^*(s)$ ,  
299 and upon the termination of Explore( $s$ ), we should have  $\pi(s) = \pi^*(s)$ .

300 In our algorithm, we maintain a dataset to store the state-action pairs  $(s, a)$  and their optimal  $Q$ -values  
301  $Q^*(s, a)$ . In order to predict the optimal  $Q$ -value of an unseen state-action pair  $(s, a)$ , we find the  
302 best predictor on the dataset using least squares, and use it to predict on  $(s, a)$ .

303 Similar to the algorithm in Section 4, the high level idea is that we use least squares to predict the  
304 optimal  $Q$ -value whenever possible, and otherwise we explore the environment. In Line 2, we check  
305 for a state  $s$ , whether the Maximum Uncertainty Oracle reports an uncertainty  $r > |\rho/2 - \delta|$ . Such a  
306 choice guarantees that the value returned by Explore( $s$ ) always equals  $V^*(s)$  and also, as we prove,  
307 upper bounds the number of times we explore, i.e., execute Line 3, by the Eluder dimension of  
308 function class  $\mathcal{F}$ .

309 **Lemma 5.2.** *For any constant  $c > 1$ , suppose  $\rho \geq 4\delta \sqrt{\frac{c \dim_E(\mathcal{F}, \frac{\rho}{4}) - 1}{c-1}} + 2\delta$ . Then we have  $|Y| \leq$   
310  $c \dim_E(\mathcal{F}, \frac{\rho}{4})$ .*

311 A proof is provided in the supplementary material. The proof relies on definition of the Eluder  
312 dimension and the Maximum Uncertainty Oracle. We remark that when applied to linear functions,  
313 using the notation in the algorithm in Section 4, the subroutine Explore( $s$ ) keeps finding an action  
314  $a \in \mathcal{A}$  which maximizes  $\phi(s, a)^\top C^{-1} \phi(s, a)$  (see Remark 1) until  $\phi(s, a)^\top C^{-1} \phi(s, a)$  is below a  
315 threshold for all actions  $a \in \mathcal{A}$ . Therefore, our algorithm is a generalization of the algorithm in  
316 Section 4.

317 Again, we remark that while Algorithm 3 depends on both  $\rho$  and  $\delta$ , one can use an exponential search  
318 for  $\rho$  and  $\delta$ , and the sample complexity will increase mildly.

## 319 6 Conclusion

320 In this paper, we propose a novel provably efficient recursion-based algorithm for agnostic  $Q$ -learning  
321 with general function approximation in deterministic systems. We obtain a sharp characterization  
322 on the relation between the approximation error and the optimality gap, and also a tight sample  
323 complexity. We help address the open problem raised by Wen and Van Roy [2013].



324 **Broader Impact**

325 The focus of this paper is purely theoretical, and thus a broader impact discussion is not applicable.

326 **References**

- 327 Yasin Abbasi-Yadkori, Dávid Pál, and Csaba Szepesvári. Improved algorithms for linear stochastic  
328 bandits. In *Advances in Neural Information Processing Systems*, pages 2312–2320, 2011.
- 329 Alekh Agarwal, Sham Kakade, and Lin F Yang. On the optimality of sparse model-based planning  
330 for markov decision processes. *arXiv preprint arXiv:1906.03804*, 2019.
- 331 Shipra Agrawal and Randy Jia. Optimistic posterior sampling for reinforcement learning: worst-case  
332 regret bounds. In *Advances in Neural Information Processing Systems*, pages 1184–1194, 2017.
- 333 Mohammad Gheshlaghi Azar, Rémi Munos, and Hilbert J Kappen. Minimax PAC bounds on the  
334 sample complexity of reinforcement learning with a generative model. *Machine learning*, 91(3):  
335 325–349, 2013.
- 336 Mohammad Gheshlaghi Azar, Ian Osband, and Rémi Munos. Minimax regret bounds for reinforce-  
337 ment learning. In *Proceedings of the 34th International Conference on Machine Learning*, pages  
338 263–272, 2017.
- 339 K. Azizzadenesheli, E. Brunskill, and A. Anandkumar. Efficient exploration through bayesian deep  
340 Q-networks. In *2018 Information Theory and Applications Workshop (ITA)*, pages 1–9, 2018.
- 341 Varsha Dani, Thomas P Hayes, and Sham M Kakade. Stochastic linear optimization under bandit  
342 feedback. 2008.
- 343 Simon S Du, Yuping Luo, Ruosong Wang, and Hanrui Zhang. Provably efficient Q-learning  
344 with function approximation via distribution shift error checking oracle. In *Advances in Neural  
345 Information Processing Systems*, pages 8058–8068, 2019.
- 346 Simon S Du, Sham M Kakade, Ruosong Wang, and Lin F Yang. Is a good representation sufficient for  
347 sample efficient reinforcement learning? In *International Conference on Learning Representations*,  
348 2020.
- 349 Meire Fortunato, Mohammad Gheshlaghi Azar, Bilal Piot, Jacob Menick, Matteo Hessel, Ian Osband,  
350 Alex Graves, Volodymyr Mnih, Remi Munos, Demis Hassabis, Olivier Pietquin, Charles Blundell,  
351 and Shane Legg. Noisy networks for exploration. In *International Conference on Learning  
352 Representations*, 2018.
- 353 Thomas Jaksch, Ronald Ortner, and Peter Auer. Near-optimal regret bounds for reinforcement  
354 learning. *Journal of Machine Learning Research*, 11(Apr):1563–1600, 2010.
- 355 Chi Jin, Zeyuan Allen-Zhu, Sebastien Bubeck, and Michael I Jordan. Is Q-learning provably efficient?  
356 In *Advances in Neural Information Processing Systems*, pages 4863–4873, 2018.
- 357 Chi Jin, Zhuoran Yang, Zhaoran Wang, and Michael I Jordan. Provably efficient reinforcement  
358 learning with linear function approximation. *arXiv preprint arXiv:1907.05388*, 2019.
- 359 Sham Kakade, Mengdi Wang, and Lin F Yang. Variance reduction methods for sublinear reinforce-  
360 ment learning. *arXiv preprint arXiv:1802.09184*, 2018.
- 361 Tor Lattimore and Marcus Hutter. PAC bounds for discounted mdps. In *International Conference on  
362 Algorithmic Learning Theory*, pages 320–334. Springer, 2012.
- 363 Tor Lattimore and Csaba Szepesvári. Bandit algorithms. *preprint*, page 28, 2018.
- 364 Tor Lattimore and Csaba Szepesvari. Learning with good feature representations in bandits and in  
365 RL with a generative model. *arXiv preprint arXiv:1911.07676*, 2019.
- 366 Lihong Li, Wei Chu, John Langford, and Robert E Schapire. A contextual-bandit approach to  
367 personalized news article recommendation. In *Proceedings of the 19th international conference on  
368 World wide web*, pages 661–670, 2010.

- 369 Lihong Li, Michael L Littman, Thomas J Walsh, and Alexander L Strehl. Knows what it knows: a  
370 framework for self-aware learning. *Machine learning*, 82(3):399–443, 2011.
- 371 Zachary Chase Lipton, Xiujun Li, Jianfeng Gao, Lihong Li, Faisal Ahmed, and Li Deng. BBQ-  
372 networks: Efficient exploration in deep reinforcement learning for task-oriented dialogue systems.  
373 In *AAAI*, 2018.
- 374 Shie Mannor and John N Tsitsiklis. The sample complexity of exploration in the multi-armed bandit  
375 problem. *Journal of Machine Learning Research*, 5(Jun):623–648, 2004.
- 376 Francisco S Melo and M Isabel Ribeiro. Q-learning with linear function approximation. In *International  
377 Conference on Computational Learning Theory*, pages 308–322, 2007.
- 378 Gergely Neu and Julia Olkhovskaya. Efficient and robust algorithms for adversarial linear contextual  
379 bandits. *arXiv preprint arXiv:2002.00287*, 2020.
- 380 Ian Osband, Benjamin Van Roy, and Zheng Wen. Generalization and exploration via randomized  
381 value functions. In *Proceedings of the 33rd International Conference on International Conference  
382 on Machine Learning*, pages 2377–2386, 2016.
- 383 Jason Pazy and Ronald Parr. PAC optimal exploration in continuous space markov decision processes.  
384 In *Proceedings of the Twenty-Seventh AAAI Conference on Artificial Intelligence*, pages 774–781,  
385 2013.
- 386 Daniel Russo and Benjamin Van Roy. Eluder dimension and the sample complexity of optimistic  
387 exploration. In *Advances in Neural Information Processing Systems*, pages 2256–2264, 2013.
- 388 Aaron Sidford, Mengdi Wang, Xian Wu, Lin Yang, and Yinyu Ye. Near-optimal time and sample  
389 complexities for solving markov decision processes with a generative model. In *Advances in  
390 Neural Information Processing Systems*, pages 5186–5196, 2018a.
- 391 Aaron Sidford, Mengdi Wang, Xian Wu, and Yinyu Ye. Variance reduced value iteration and faster  
392 algorithms for solving markov decision processes. In *Proceedings of the Twenty-Ninth Annual  
393 ACM-SIAM Symposium on Discrete Algorithms*, pages 770–787. SIAM, 2018b.
- 394 Max Simchowitz and Kevin G Jamieson. Non-asymptotic gap-dependent regret bounds for tabular  
395 mdps. In *Advances in Neural Information Processing Systems*, pages 1151–1160, 2019.
- 396 Alexander L Strehl, Lihong Li, Eric Wiewiora, John Langford, and Michael L Littman. PAC model-  
397 free reinforcement learning. In *Proceedings of the 23rd international conference on Machine  
398 learning*, pages 881–888. ACM, 2006.
- 399 Benjamin Van Roy and Shi Dong. Comments on the Du-Kakade-Wang-Yang lower bounds. *arXiv  
400 preprint arXiv:1911.07910*, 2019.
- 401 Yining Wang, Ruosong Wang, Simon S Du, and Akshay Krishnamurthy. Optimism in reinforcement  
402 learning with generalized linear function approximation. *arXiv preprint arXiv:1912.04136*, 2019.
- 403 Christopher JCH Watkins and Peter Dayan. Q-learning. *Machine learning*, 8(3-4):279–292, 1992.
- 404 Zheng Wen and Benjamin Van Roy. Efficient exploration and value function generalization in  
405 deterministic systems. In *Advances in Neural Information Processing Systems*, pages 3021–3029,  
406 2013.
- 407 Lin F. Yang and Mengdi Wang. Reinforcement leaning in feature space: Matrix bandit, kernels, and  
408 regret bound. *arXiv preprint arXiv:1905.10389*, 2019a.
- 409 Lin F. Yang and Mengdi Wang. Sample-optimal parametric q-learning using linearly additive features.  
410 In *International Conference on Machine Learning*, pages 6995–7004, 2019b.
- 411 Andrea Zanette, Mykel J Kochenderfer, and Emma Brunskill. Almost horizon-free structure-aware  
412 best policy identification with a generative model. In *Advances in Neural Information Processing  
413 Systems*, pages 5626–5635, 2019.
- 414 Shaofeng Zou, Tengyu Xu, and Yingbin Liang. Finite-sample analysis for SARSA with linear  
415 function approximation. In *Advances in Neural Information Processing Systems*, pages 8665–8675,  
416 2019.

417 **A Proof of Proposition 1.2**

418 In this section, we briefly discuss how to generalize the results in [Du et al., 2020] to prove Proposi-  
419 tion 1.2. We first recall Theorem 4.1 in [Du et al., 2020].

420 **Proposition A.1** (Theorem 4.1 in [Du et al., 2020]). *There exists a family of deterministic systems*  
421  *$\mathcal{M}$  such that for any  $M \in \mathcal{M}$ , the following conditions hold. There exists a feature extractor*  
422  *$\phi : \mathcal{S} \times \mathcal{A} \rightarrow \mathbb{R}^d$  and  $\theta_1, \theta_2, \dots, \theta_H \in \mathbb{R}^d$  such that  $d = O(H/\delta^2)$ , and for any  $h \in [H]$  and any*  
423  *$(s, a) \in \mathcal{S}_h \times \mathcal{A}$ ,*

$$|Q^*(s, a) - \theta_h^\top \phi(s, a)| \leq \delta.$$

424 *Moreover, for the deterministic systems in  $\mathcal{M}$ , any algorithm that returns a 1/2-optimal policy with*  
425 *probability 0.9 needs to sample  $\Omega(2^H)$  trajectories.*

426 We first note that the assumption in Proposition A.1 is slightly different from ours. In this paper, we  
427 assume there exists a single vector  $\theta \in \mathbb{R}^d$  such that for any  $(s, a) \in \mathcal{S} \times \mathcal{A}$ ,

$$|Q^*(s, a) - \theta^\top \phi(s, a)| \leq \delta.$$

428 However, the lower bound in [Du et al., 2020] can still be generalized to hold under our assumption,  
429 if one breaks the feature space into  $H$  blocks so that each block contains  $d/H$  coordinates, and for  
430 any state  $s_1 \in \mathcal{S}_1$  and  $a \in \mathcal{A}$ ,  $\phi(s_1, a)$  contains non-zero entries only in the first block, and for any  
431 state  $s_2 \in \mathcal{S}_2$  and  $a \in \mathcal{A}$ ,  $\phi(s_2, a)$  contains non-zero entries only in the second block, etc. By doing  
432 so, we need to change the condition  $d = O(H/\delta^2)$  to  $d = O(H^2/\delta^2)$ .

433 Moreover, in order to prove an  $\Omega(2^C)$  sample complexity lower bound, one only needs to use the first  
434  $C$  levels in the family of deterministic systems in Proposition A.1, and add  $H - C$  dummy levels so  
435 that there are  $H$  levels in total. In this case, Proposition A.1 requires  $d = O(C^2/\delta^2)$ , or equivalently,  
436  $\delta = \Omega(C/\sqrt{d})$ .

437 Finally, by scrutinizing the construction in [Du et al., 2020], it can be seen that the optimality gap  
438  $\rho = 1$ . In general, for a given value  $\rho \leq 1$ , we can scale all reward values and the vector  $\theta$  in the  
439 original construction by  $\rho$ . By doing so, the approximation error  $\delta = \Omega(C/\sqrt{d} \cdot \rho)$ .

440 **B Missing Proofs in Section 4**

441 *Proof of Theorem 4.1.* Recall that by Definition 3.2 and Definition 3.3, there exists  $\theta \in \mathbb{R}^d$  with  
442  $\|\theta\|_2 \leq 1$  such that  $|Q^*(s, a) - \theta^\top \phi(s, a)| \leq \delta$  for all state-action pairs  $(s, a)$ .

443 Since the sample complexity of our algorithm equals the number of times we execute Line 5 in  
444  $\text{Explore}(s)$ , following Lemma 4.2, the sample complexity of our algorithm is  $O(d \log(1/\rho))$ .

445 To complete the proof, it is sufficient to prove the following induction hypothesis for all levels  
446  $h \in [H]$ .

447 **Induction Hypothesis.**

448 I When Line 6 is executed for any state  $s \in \mathcal{S}_h$ ,  $\hat{Q}(s, a) = Q^*(s, a)$ .

449 II Each time Line 10 in  $\text{Explore}(s)$  is executed for any state  $s \in \mathcal{S}_h$ , we have  $\pi(s) = \pi^*(s)$ , and  
450 the value returned by  $\text{Explore}(s)$  equals  $V^*(s)$ .

451 For the above induction hypothesis, the base case  $h = H$  is clearly true. Now we assume the  
452 induction hypothesis holds for all levels  $H, \dots, h + 1$  and prove it holds for all levels  $h \in [H]$ .

453 **Induction Hypothesis I.** This follows from Induction Hypothesis II for level  $h + 1$  and the Bellman  
454 equations.

455 **Induction Hypothesis II.** By Induction Hypothesis I and Definition 3.1, we only need to show  
456 when Line 3 is executed, we have  $|\hat{Q}(s, a) - Q^*(s, a)| \leq \rho/2$ , in which case we have  $\pi(s) = \pi^*(s)$ .  
457 To verify this, note that

$$|\phi(s, a)^\top C^{-1}Y - Q^*(s, a)| \leq |\phi(s, a)^\top C^{-1}Y - \theta^\top \phi(s, a)| + |Q^*(s, a) - \theta^\top \phi(s, a)|.$$

458 The second term is bounded by  $\delta$ . For the first term, we write  $\Phi$  to be a matrix whose  $i$ -th column is  
 459 the  $i$ -th  $\phi(s, a)$  vector in the summation. Recall that

$$C = \left( \sum \phi(s, a)\phi(s, a)^\top \right) + \rho^2/16 \cdot I = \Phi\Phi^\top + \rho^2/16 \cdot I$$

460 and

$$Y = \sum \phi(s, a)Q^*(s, a)$$

461 by Induction Hypothesis I. Moreover,

$$Y = \sum \phi(s, a)(\phi(s, a)^\top \theta + b(s, a))$$

462 where  $|b(\cdot, \cdot)| \leq \delta$ . Thus, the first term can be upper bounded by

$$\|\phi(s, a)^\top C^{-1}\Phi\|_1 \cdot \delta + |\phi(s, a)^\top (C^{-1}\Phi\Phi^\top - I)\theta|.$$

463 For the first term, by Lemma 4.2 there are at most  $2d \log(16/\rho^2)$  columns in  $\Phi$ . When Line 3 is  
 464 executed, we must have  $\phi(s, a)^\top C^{-1}\phi(s, a) \leq 1$ . Using Lemma B.1 we have

$$\begin{aligned} & \|\phi(s, a)^\top C^{-1}\Phi\|_1 \\ & \leq \sqrt{2d \log(16/\rho^2)} \cdot \|\phi(s, a)^\top C^{-1}\Phi\|_2 \\ & = \sqrt{2d \log(16/\rho^2)} \cdot \sqrt{\phi(s, a)^\top C^{-1}\Phi\Phi^\top C^{-1}\phi(s, a)} \\ & \leq \sqrt{2d \log(16/\rho^2)}. \end{aligned}$$

465 For the second term, since  $\|\theta\|_2 \leq 1$  and  $\phi(s, a)^\top C^{-1}\phi(s, a) \leq 1$ , by Cauchy-Schwarz and  
 466 Lemma B.1, we have

$$|\phi(s, a)^\top (C^{-1}\Phi^\top\Phi - I)\theta| \leq \|\phi(s, a)^\top (C^{-1}\Phi^\top\Phi - I)\|_2 \leq \rho/4.$$

467 All together we get

$$|\phi(s, a)^\top C^{-1}Y - Q^*(s, a)| \leq \rho/2$$

468 which completes the proof.  $\square$

469 *Proof of Lemma 4.2.* Suppose Line 7 has been executed for  $T$  times, since  $\|\phi(s, a)\|_2 \leq 1$ , the trace  
 470 of  $\phi(s, a)\phi(s, a)^\top$  is upper bounded by  $\|\phi(s, a)\|_2^2 \leq 1$ . By additivity of trace, the trace of  $C$  is  
 471 upper bounded by

$$T + d \cdot \rho^2/16$$

472 since initially the trace of  $C$  is  $d \cdot \rho^2/16$ . By AM-GM,

$$\det(C) \leq (T/d + \rho^2/16)^d.$$

473 However, each time Line 7 is executed, by matrix determinant lemma,  $\det(C)$  will be increased by a  
 474 factor of

$$1 + \phi(s_h, a)^\top C^{-1}\phi(s_h, a) \geq 2.$$

475 Moreover, initially  $\det(C) = (\rho^2/16)^d$ . Thus,

$$2^T (\rho^2/16)^d \leq (T/d + \rho^2/16)^d,$$

476 which proves the lemma.  $\square$

477 **Lemma B.1.** For any positive semi-definite  $M \in \mathbb{R}^{d \times d}$ ,  $\alpha > 0$  and  $x \in \mathbb{R}^d$  such that  $x^\top (M + \alpha \cdot$   
 478  $I)^{-1}x \leq 1$ , we have

- 479  $\bullet \|(M(M + \alpha \cdot I)^{-1} - I)x\|_2 \leq \alpha;$
- 480  $\bullet x^\top (M + \alpha \cdot I)^{-1}M(M + \alpha \cdot I)^{-1}x \leq 1.$

481 *Proof.* We use  $M = U^T \Lambda U$  to denote the spectral decomposition of  $M$ , where  $\Lambda$  is a diagonal  
 482 matrix with non-negative entries. We use  $\Lambda_i$  to denote the  $i$ -th diagonal entry of  $\Lambda$  and let  $y = Ux$ .  
 483 By the assumption, it holds that

$$\sum_{i=1}^d \frac{y_i^2}{\Lambda_i + \alpha} \leq 1.$$

484 Clearly,

$$\begin{aligned} & \| (M(M + \alpha \cdot I)^{-1} - I)x \|_2^2 \\ &= \sum_{i=1}^d y_i^2 \cdot \left( \frac{\Lambda_i}{\Lambda_i + \alpha} - 1 \right)^2 = \sum_{i=1}^d y_i^2 \cdot \left( \frac{\alpha}{\Lambda_i + \alpha} \right)^2 \leq \alpha \end{aligned}$$

485 and

$$\begin{aligned} & x^\top (M + \alpha \cdot I)^{-1} M (M + \alpha \cdot I)^{-1} x \\ &= \sum_{i=1}^d y_i^2 \cdot \frac{\Lambda_i}{(\Lambda_i + \alpha \cdot I)^2} \leq 1. \end{aligned}$$

486

□

## 487 C Missing Proofs in Section 5

488 *Proof of Theorem 5.1.* Firstly, using Lemma 5.2 with  $c = 18$  we have

$$|Y| \leq 18 \dim_E(\mathcal{F}, \frac{\rho}{4}), \quad (4)$$

489 i.e. Line 3 is executed for at most  $18 \dim_E(\mathcal{F}, \rho/4)$  times and therefore the sample complexity of our  
 490 algorithm is  $O(\dim_E(\mathcal{F}, \rho/4))$ .

491 To complete the proof, it is sufficient to prove the following induction hypothesis for all levels  
 492  $h \in [H]$ .

### 493 Induction Hypothesis.

494 I For any state  $s \in \mathcal{S}_h$ , when Line 6 in `Explore`( $s$ ) is executed, we have  $y_i = Q^*(s_i, a_i)$  for all  
 495  $(s_i, a_i, y_i) \in Y$ .

496 II For any state  $s \in \mathcal{S}_h$ , when Line 7 in `Explore`( $s$ ) is executed, we have  $\pi(s) = \pi^*(s)$ , and the  
 497 value returned by `Explore`( $s$ ) is  $V^*(s)$ .

498 For the above induction hypothesis, the base case  $h = H$  is clearly true. Now we assume the  
 499 induction hypothesis holds for all levels  $H, \dots, h + 1$  and prove it holds for all levels  $h \in [H]$ .

500 **Induction Hypothesis I.** From Induction Hypothesis II for level  $h + 1$ , it follows that value returned  
 501 by `Explore`( $P(s, a)$ ) is  $V^*(P(s, a))$  for all  $a \in \mathcal{A}$ . Then, Induction Hypothesis I follows from the  
 502 Bellman equations.

503 **Induction Hypothesis II.** It suffices to show that for any state  $s \in \mathcal{S}_h$ , when Line 7 in `Explore`( $s$ )  
 504 is executed, for all actions  $a \in \mathcal{A}$

$$|f(s, a) - Q^*(s, a)| \leq \frac{\rho}{2}. \quad (5)$$

505 First, there exists  $f^* \in \mathcal{F}$  such that for all  $(s_i, a_i, y_i) \in Y$ ,

$$|f^*(s_i, a_i) - Q^*(s_i, a_i)| \leq \delta. \quad (6)$$

506 From Induction Hypothesis I, for all  $(s_i, a_i, y_i) \in Y$

$$y_i = Q^*(s_i, a_i). \quad (7)$$

507 From Equation (6) and (7), it follows that

$$\sum_{(s_i, a_i, y_i) \in Y} |f^*(s_i, a_i) - y_i|^2 \leq |Y|\delta^2. \quad (8)$$

508 Since, we execute Line 6 and  $f^* \in \mathcal{F}$ , from Equation (8), it follows that

$$\sum_{(s_i, a_i, y_i) \in Y} |f(s_i, a_i) - y_i|^2 \leq |Y|\delta^2. \quad (9)$$

509 We split the analysis into two cases:

510 (1) we consider actions for which we execute Line 3 and

511 (2) we consider rest of the actions.

512 **Case 1:** We now prove Equation (5) for all actions  $a$  for which we execute Line 3. Using Equation  
513 (4), (7) and (9), we get that for actions  $a$  for which we executed Line 3 (since then we added it to  $Y$ )

$$|f(s, a) - Q^*(s, a)| \leq \sqrt{18 \dim_E(F, \frac{\rho}{4})} \delta \leq \frac{\rho}{2} \quad (10)$$

514 where the last step follows from our assumption on  $\rho$  (Equation (3)).

515 **Case 2:** We now prove this for rest of the actions  $a$ . From Equation (6), (7), (9) and triangle  
516 inequality for the  $\ell_2$  norm, we get

$$\sum_{(s_i, a_i, y_i) \in Y} |f^*(s_i, a_i) - f(s_i, a_i)|^2 \leq 4|Y|\delta^2. \quad (11)$$

517 Also, since we did not add this action to  $Y$ , by the definition of the oracle (Definition 5.1), we get

$$|f^*(s, a) - f(s, a)| \leq \frac{\rho}{2} - \delta. \quad (12)$$

518 Therefore,

$$|Q^*(s, a) - f(s, a)| \leq \frac{\rho}{2} \quad (13)$$

519 which completes the proof.  $\square$

520 *Proof of Lemma 5.2.* For some  $n > 0$ , assume

$$Y = \{(s_1, a_1, y_1), \dots, (s_n, a_n, y_n)\}.$$

521 We will show that  $n$  is upper bounded by Eluder dimension. When we add  $(s_j, a_j, y_j)$  to  $Y$  at Line 3,

522 1. The condition at Line 2 must be True i.e. from Equation (1), there exists  $f_1, f_2 \in F$  such  
523 that  $|f_1(s_j, a_j) - f_2(s_j, a_j)| > \frac{\rho}{2} - \delta$ .

524 2. Observe that for any subsequence  $B \subset \{(s_1, a_1), \dots, (s_{j-1}, a_{j-1})\}$  where  $(s_j, a_j)$  is  
525  $(\frac{\rho}{2} - \delta)$ -dependent on  $B$  (Definition 3.4),

$$\sum_{(s, a) \in B} |f_1(s, a) - f_2(s, a)|^2 \geq (\frac{\rho}{2} - \delta)^2. \quad (14)$$

526 3. Therefore, if there are  $K$  disjoint subsequences in  $\{(s_1, a_1), \dots, (s_{j-1}, a_{j-1})\}$  such that  
527  $(s_j, a_j)$  is  $(\frac{\rho}{2} - \delta)$ -dependent on all of them, then

$$\sum_{i=1}^{j-1} |f_1(s_i, a_i) - f_2(s_i, a_i)|^2 \geq K(\frac{\rho}{2} - \delta)^2. \quad (15)$$

528 4. However, using Equation 2, we have that

$$\sum_{i=1}^{j-1} |f_1(s_i, a_i) - f_2(s_i, a_i)|^2 \leq (j-1)(2\delta)^2. \quad (16)$$

529 Therefore, we can upper bound for any state-action pair  $(s_j, a_j) \in \{(s_1, a_1), \dots, (s_n, a_n)\}$ , the  
 530 number of disjoint subsequences  $K$  in  $\{(s_1, a_1), \dots, (s_{j-1}, a_{j-1})\}$  that  $(s_j, a_j)$  is  $(\frac{\rho}{2} - \delta)$ -dependent  
 531 on, i.e.

$$K \leq \frac{(j-1)(2\delta)^2}{(\frac{\rho}{2} - \delta)^2}.$$

532 Moreover, it follows from the proof of Proposition 3 in [Russo and Van Roy, 2013] that for any  
 533 sequence of state-action pairs say  $\{(s_1, a_1), \dots, (s_n, a_n)\}$ , there exists a  $(s_j, a_j)$  which is  $(\frac{\rho}{2} - \delta)$ -  
 534 dependent on at least  $\frac{n}{\dim_E(F, \frac{\rho}{2} - \delta)} - 1$  disjoint subsequences in  $\{(s_1, a_1), \dots, (s_{j-1}, a_{j-1})\}$ .  
 535 Therefore,

$$\frac{n}{\dim_E(F, \frac{\rho}{2} - \delta)} - 1 \leq K \leq \frac{(j-1)(2\delta)^2}{(\frac{\rho}{2} - \delta)^2} \quad (17)$$

536 and thus

$$n \leq \dim_E(F, \frac{\rho}{2} - \delta) \left( \frac{(n-1)(2\delta)^2}{(\frac{\rho}{2} - \delta)^2} + 1 \right). \quad (18)$$

537 As  $\rho > 4\delta$ , we get

$$n \leq \dim_E(F, \frac{\rho}{4}) \left( \frac{(n-1)(2\delta)^2}{(\frac{\rho}{2} - \delta)^2} + 1 \right) \quad (19)$$

538 which follows from definition of Eluder dimension since  $a < b$  implies  $\dim_E(F, a) \geq \dim_E(F, b)$ .  
 539 For any  $\rho$  and  $c > 1$  such that

$$\rho \geq 2 \left( 2 \sqrt{\frac{c \dim_E(F, \frac{\rho}{4}) - 1}{c-1}} + 1 \right) \delta \quad (20)$$

540 we get from Equation (19) that

$$n \leq c \dim_E(F, \frac{\rho}{4}). \quad (21)$$

541 □

## 542 D Extension to Stochastic Rewards

---

### Algorithm 5 Main Algorithm

---

- 1: Initialize the current policy  $\pi$  and  $f$  arbitrarily
  - 2: **set**  $Y = \{\}$
  - 3: **invoke** Explore( $s_1$ )
- 

543 In this section, we extend our algorithm and analysis to stochastic rewards, i.e., reward  $r(s, a) \sim$   
 544  $R(s, a)$  is a random variable with expectation  $\bar{r}(s, a)$  and  $r(s, a) \in [0, 1]$ .

### 545 D.1 Algorithm

546 We modify Explore( $s$ ) such that whenever previously we used  $r(s, a)$ , we use the empirical mean  
 547  $\hat{r}(s, a)$  of  $n$  samples from  $R(s, a)$  to get a good estimate of the expected reward  $\bar{r}(s, a)$ . For our  
 548 algorithm, we set

$$n = \frac{H^2}{2\delta_r^2} \log \frac{18 \dim_E(\mathcal{F}, \rho/4)H}{p}, \quad (22)$$

549 where  $\delta_r$  is a parameter to be chosen and  $p$  is the failure probability of the algorithm.

---

**Algorithm 6** Explore( $s$ )

---

1: **set**  $(a, r) = \text{Oracle}(s, 2(\delta + \delta_r), Y)$   
2: **while**  $r > |\frac{\rho}{2} - \delta|$  **do**  
3:   **set**  $\hat{r}(s, a)$  to be the empirical mean of  $n = \frac{H^2}{2\delta_r^2} \log \frac{18 \dim_E(\mathcal{F}, \rho/4) H}{p}$  samples from  $R(s, a)$   
4:   **set**  
          
$$Y = \begin{cases} Y \cup \{(s, a, \hat{r}(s, a))\} & s \in \mathcal{S}_H \\ Y \cup \{(s, a, \text{Explore}(P(s, a)) + \hat{r}(s, a))\} & \text{otherwise} \end{cases}$$
  
5:   **set**  $(a, r) = \text{Oracle}(s, 2(\delta + \delta_r), Y)$   
6: **end while**  
7: **set**  $f = \operatorname{argmin}_{f \in \mathcal{F}} \sum_{(s_i, a_i, y_i) \in Y} |f(s_i, a_i) - y_i|^2$   
8: **set**  $\pi(s) = \operatorname{argmax}_{a \in \mathcal{A}} f(s, a)$   
9: **return**  
          
$$\begin{cases} \hat{r}(s, \pi(s)) & s \in \mathcal{S}_H \\ \hat{r}(s, \pi(s)) + \text{Explore}(P(s, \pi(s))) & \text{otherwise} \end{cases}$$

---

**D.2 Analysis**

551 **Theorem D.1.** *Suppose*

$$\rho \geq 6\sqrt{2}(\delta + \delta_r)\sqrt{\dim_E(\mathcal{F}, \rho/4)} + 2\delta_r. \quad (23)$$

552 *Algorithm 5 returns the optimal policy  $\pi^*$  with probability  $1 - p$ .*

553 **Remark 2.** *Note that by setting*

$$\delta_r = \frac{\rho}{24\sqrt{2 \dim_E(\mathcal{F}, \rho/4)}} \quad \text{and} \quad \rho \geq 12\sqrt{2}\delta\sqrt{\dim_E(\mathcal{F}, \rho/4)}, \quad (24)$$

554 *Theorem D.1 implies that Algorithm 5 returns the optimal policy  $\pi^*$  with probability  $1 - p$  using at*  
555 *most*

$$\frac{\text{poly}(\dim_E(\mathcal{F}, \rho/4), H)}{\rho^2} \log(1/p)$$

556 *trajectories.*

557 Now we formally prove Theorem D.1.

558 *Proof of Theorem D.1.* Firstly, for  $c = 18$ , following Lemma D.2, we have

$$|Y| \leq 18 \dim_E(\mathcal{F}, \rho/4), \quad (25)$$

559 i.e. Line 4 is executed for at most  $18 \dim_E(\mathcal{F}, \rho/4)$  times.

560

561 To complete the proof, it is sufficient to prove the following induction hypothesis for all  
562 levels  $h \in [H]$ .

**Induction Hypothesis.**

563 1. For any state  $s \in \mathcal{S}_h$ , when Line 7 in Explore( $s$ ) is executed, we have

$$y_i \in \left[ Q^*(s_i, a_i) - \frac{H-h+1}{H} \delta_r, Q^*(s_i, a_i) + \frac{H-h+1}{H} \delta_r \right]$$

565 for all  $(s_i, a_i, y_i) \in Y$ .

566 2. For any state  $s \in \mathcal{S}_h$ , when Line 8 in Explore( $s$ ) is executed, we have  $\pi(s) = \pi^*(s)$ , and  
567 the value returned by Explore( $s$ ) is in

$$\left[ V^*(s) - \frac{H-h+1}{H} \delta_r, V^*(s) + \frac{H-h+1}{H} \delta_r \right].$$

568

569 Note that the base case  $h = H$  is true by Lemma D.3 and union bound. Now we assume the induction  
570 hypothesis holds for all levels  $H, \dots, h+1$  and prove it holds for level  $h$ .



571 **Induction Hypothesis 1.** From Induction Hypothesis 2 for level  $h+1$ , it follows that value returned  
 572 by  $\text{Explore}(P(s, a))$  is in

$$\left[ V^*(P(s, a)) - \frac{H-h}{H} \delta_r, V^*(P(s, a)) + \frac{H-h}{H} \delta_r \right]$$

573 for all  $a \in \mathcal{A}$ . Then, Induction Hypothesis 1 follows from Lemma D.3 and union bound.

574 **Induction Hypothesis 2.** It suffices to show that for any state  $s \in \mathcal{S}_h$ , when Line 8 in  $\text{Explore}(s)$   
 575 is executed, then for all actions  $a \in \mathcal{A}$

$$|f(s, a) - Q^*(s, a)| \leq \frac{\rho}{2}. \quad (26)$$

576 Similar to proof of Theorem 5.1, we get

$$\sum_{(s_i, a_i, y_i) \in Y} |f(s_i, a_i) - y_i|^2 \leq |Y|(\delta + \delta_r)^2. \quad (27)$$

577 We split the analysis in two cases:

- 578 1. we consider actions for which we execute Line 4 and  
 579 2. we consider rest of the actions.

580 **Case 1:** We now prove Equation (26) for all actions  $a$  for which we execute Line 4. Similar to  
 581 proof of Theorem 5.1, we get

$$|f(s, a) - Q^*(s, a)| \leq \sqrt{18 \dim_E(\mathcal{F}, \rho/4)}(\delta + \delta_r) + \delta_r \leq \frac{\rho}{2}. \quad (28)$$

582 **Case 2:** We now prove this for rest of the actions  $a$ . Similar to proof of Theorem 5.1, we get

$$\sum_{(s_i, a_i, y_i) \in Y} |f^*(s_i, a_i) - f(s_i, a_i)|^2 \leq 4|Y|(\delta + \delta_r)^2. \quad (29)$$

583 Also, since we did not add this action to  $Y$ , by the definition of the oracle (Definition 5.1), we get

$$|Q^*(s, a) - f(s, a)| \leq \frac{\rho}{2}, \quad (30)$$

584 which completes the proof.  $\square$

585 **Lemma D.2.** For any constant  $c > 1$ , if

$$\rho \geq 4(\delta + \delta_r) \sqrt{\frac{c \dim_E(\mathcal{F}, \rho/4) - 1}{c - 1}} + 2\delta, \quad (31)$$

586 then

$$|Y| \leq c \dim_E(\mathcal{F}, \rho/4). \quad (32)$$

587 *Proof.* Let  $Y = \{(s_1, a_1, y_1), \dots, (s_n, a_n, y_n)\}$ . Similar to proof of Lemma 5.2, we can upper bound  
 588 for any state-action pair  $(s_j, a_j) \in \{(s_1, a_1), \dots, (s_n, a_n)\}$ , the number of disjoint subsequences  $K$   
 589 in  $\{(s_1, a_1), \dots, (s_{j-1}, a_{j-1})\}$  that  $(s_j, a_j)$  is  $(\frac{\rho}{2} - \delta)$ -dependent on, i.e.

$$K \leq \frac{(j-1)(2(\delta + \delta_r))^2}{(\frac{\rho}{2} - \delta)^2}.$$

590 Also, for any sequence of state-action pairs say  $\{(s_1, a_1), \dots, (s_n, a_n)\}$ , there exists a  
 591  $(s_j, a_j)$  which is  $(\frac{\rho}{2} - \delta)$ -dependent on at least  $\frac{n}{\dim_E(F, \frac{\rho}{2} - \delta)} - 1$  disjoint subsequences in  
 592  $\{(s_1, a_1), \dots, (s_{j-1}, a_{j-1})\}$ . Therefore,

$$\frac{n}{\dim_E(F, \frac{\rho}{2} - \delta)} - 1 \leq K \leq \frac{(j-1)(2(\delta + \delta_r))^2}{(\frac{\rho}{2} - \delta)^2}. \quad (33)$$

593 That is, for any  $\rho$  and  $c > 1$  such that

$$\rho \geq 2 \left( 2(\delta + \delta_r) \sqrt{\frac{c \dim_E(\mathcal{F}, \rho/4) - 1}{c - 1}} + \delta \right), \quad (34)$$

594 we get

$$n \leq c \dim_E(\mathcal{F}, \rho/4). \quad (35)$$

595

□

596 A simple concentration bound gives the following lemma:

597 **Lemma D.3.** *For any fixed state  $s$  and action  $a$ , consider  $n \geq \frac{H^2}{2\delta_r^2} \log \frac{1}{p}$  random independent samples*  
598  *$\{r_i(s, a)\}_{i=1}^n$  of random variable  $R(s, a)$  with expectation  $\bar{r}(s, a)$  and  $r_i(s, a) \in [0, 1]$ . Then,*

$$\left| \frac{1}{n} \sum_{i=1}^n r_i(s, a) - \bar{r}(s, a) \right| \leq \frac{\delta_r}{H}$$

599 *with probability at least  $1 - p$ .*
